# Supplementary material for: Protective Immunity in Mice Immunized With P. vivax MSP119-Based Formulations and Challenged With P. berghei Expressing PvMSP119
Source: PubMed Central journal article supplement (PMC7045055; doi:10.3389/fimmu.2020.00028), 2020-02-19
Supplement: Data_Sheet_1.pdf [file Data_Sheet_1.pdf]

## Supplementary Material

```

Pv42_vacc      1  EAPEILVPAGISDYDVVYLKPLAGMYKTIKKQLENHVNAFNTNITDMLDSRLKKRNYFLE
Pv19_vacc      1  -----
Pv19_SalI      1  -----
Pv19_PVP01     1  -----
Pv19_Belem     1  -----
Pv19_isolate   1  -----

Pv42_vacc      61  VLNSDLNPFKYSPSGEYIIKDPYKLLDLEKKKKLLGSYKYIGASIDKDLATANDGVTYYN
Pv19_vacc      1  -----
Pv19_SalI      1  -----
Pv19_PVP01     1  -----
Pv19_Belem     1  -----
Pv19_isolate   1  -----

Pv42_vacc      121 KMGELYKTHLTAVNEEVKKVEADIKAEDDKIKKIGSDSTKTTTEKTQSMAKKAELEKYLPF
Pv19_vacc      1  -----
Pv19_SalI      1  -----
Pv19_PVP01     1  -----
Pv19_Belem     1  -----
Pv19_isolate   1  -----

Pv42_vacc      181  LNSLQKEYESLVSKVNTYTDNLKKVINNCQLEKKEAEITVKKLQDYNKMDEKLEEYKKESE
Pv19_vacc      1  -----
Pv19_SalI      1  -----
Pv19_PVP01     1  -----
Pv19_Belem     1  -----
Pv19_isolate   1  -----

Pv42_vacc      241  KKNEVKSSGLEKLMKSKLIKENESKEILSQLLNVQTQLLTMSSSEHTCIDTNVPDNAACY
Pv19_vacc      1  -----MSSEHTCIDTNVPDNAACY
Pv19_SalI      1  -----CIDTNVPDNAACY
Pv19_PVP01     1  -----CIDTNVPDNAACY
Pv19_Belem     1  -----CIDTNVPDNAACY
Pv19_isolate   1  -----CIDTNVPDNAACY

Pv42_vacc      301  RYLDGTEEWRCLLTFKEEGGKCPASNVTCNDNNGGCAPEAECKMTDSNKIVCKCTREGS
Pv19_vacc      20  RYLDGTEEWRCLLTFKEEGGKCPASNVTCNDNNGGCAPEAECKMTDSNKIVCKCTREGS
Pv19_SalI      14  RYLDGTEEWRCLLTFKEEGGKCPASNVTCNDNNGGCAPEAECKMTDSNKIVCKCTREGS
Pv19_PVP01     14  RYLDGTEEWRCLLTFKEEGGKCPASNVTCNDNNGGCAPEAECKMTDSNKIVCKCTREGS
Pv19_Belem     14  RYLDGTEEWRCLLTFKEEGGKCPASNVTCNDNNGGCAPEAECKMTDSNKIVCKCTREGS
Pv19_isolate   14  RYLDGTEEWRCLLTFKEEGGKCPASNVTCNDNNGGCAPEAECKMTDSNKIVCKCTREGS

Pv42_vacc      361  EPLFEGVFC-----
Pv19_vacc      80  EPLFEGVFC-----
Pv19_SalI      74  EPLFEGVFCSSSSFLSLSFLLLMLLFLLCMEL
Pv19_PVP01     74  EPLFEGVFCSSSSFLSLSFLLLMLLFLLCMEL
Pv19_Belem     74  EPLFEGVFCSSSSFLSLSFLLLMLLFLLCMEL
Pv19_isolate   74  EPLFEGVFCSSSSFLSLSFLLLMLLFLLCMEL

```

**Supplementary Figure 1.** Alignment of the *Pv*MSP1 amino acid sequences present in the  $\alpha$ DEC-*Pv*MSP1<sub>42</sub> (Pv42\_vacc) and all the MSP1<sub>19</sub> formulations (Pv19\_vacc), compared to the *Pv*MSP1<sub>19</sub> amino acid sequences of the *P. vivax* strains SalI (PlasmoDB: PVX\_099980), PVP01 (PlasmoDB: PVP01\_0728900) and Belém (GenBank: AAN86208.1), as well as with the sequence obtained from a field isolate and used to generate the *P. berghei* hybrid parasites.

Supplementary Table 1.

| Target                             | Primer name     | Sequence 5'- 3'                               |
|------------------------------------|-----------------|-----------------------------------------------|
| <b><i>Plasmid constructs</i></b>   |                 |                                               |
| hDHFR                              | hDhfr_Fw_EcoRI  | GGGGAATTCTGCAGCCCAGCTTAATTCTTTTC              |
| hDHFR                              | hDhfr_Rv_SmaI   | AGTCCC GG GAAATTGAAGGAAAAACATCATTGTG          |
| <i>P. berghei</i> MSP1             | Pb_Fw_KpnI      | GGGGGTACCGCAATCGACAAATTAGAGAACTTAGTAT         |
| <i>P. berghei</i> MSP1             | Pb_Rv           | TACATGCTTAGGGTCTATACCTAATAAATC                |
| <i>msp1</i> 3'UTR                  | PbM3'_Fw_SmaI   | ATGCCCGGGATAAATTATTGAAATATTTGTTGGATT          |
| <i>msp1</i> 3'UTR                  | PbM3'_Rv_NotI   | GATGCGGCCGCAACAATATTTCCCAAGCTTGTTAT           |
| <i>P. vivax</i> MSP1 <sub>19</sub> | Pv_Fw           | GGTATAGACCCTAAGCATGTATGTATAGACACCAATGTGCCTGAT |
| <i>P. vivax</i> MSP1 <sub>19</sub> | Pv_Rv_XhoI      | GGGCTCGAGTTAAAGCTCCATGCACAGGAGGAAAAG          |
| <i>trap</i> 3'UTR                  | trap3'_Fw_XhoI  | GGGCTCGAGTTTTAATAAACATATATATCTAGATG           |
| <i>trap</i> 3'UTR                  | trap3'_Rv_EcoRI | GGGGAATTCTTTTTGTTTCGTAAATTTTAAAATAAT          |
| GFP cassette                       | Fw_GFP          | AGTCCC GG GAAATATACGTAATA                     |
| GFP cassette                       | Rv_GFP          | ACTCCC GG GAAATACCAATAATACC                   |
| <b><i>Genotypic analysis</i></b>   |                 |                                               |
| <i>MSP1</i>                        | P1              | GTGAAGAAGATATTCCTGCC                          |
| <i>MSP1</i>                        | P2              | TCAAAGAGTGGCTCAGAACC                          |

*MSP1*

P3

GCAGTTGGATCACATCCACC

---

*Restriction sites are highlighted in bold letters*
